# Supplementary material
Source: HighWire-hosted journal article supplement (http://www.cmaj.ca/highwire/filestream/59396/field_highwire_adjunct_files/1/150085-res-2-at.pdf)
Supplement: 150085-res-2-at.pdf [file 150085-res-2-at.pdf]

Appendix 2 (as supplied by the authors): Sensitivity analysis for age as factor in the time from acute admission to surgery (in hours) in those receiving surgery following tSCI. The ages of 60, 65, and 75 years were analysed in comparison to the 70 years in the model.

| Age threshold (years) | Estimate ( $\beta$ ) | Standard Error | p value | n   | AIC      | BIC      |
|-----------------------|----------------------|----------------|---------|-----|----------|----------|
| 60                    | 0.4392               | 0.09219        | <0.001  | 379 | 120.4834 | 122.5943 |
| 65                    | 0.45001              | 0.10410        | <0.001  | 263 | 124.4255 | 126.5363 |
| 70                    | 0.38566              | 0.12199        | 0.0016  | 167 | 133.0461 | 135.1570 |
| 75                    | 0.31751              | 0.16268        | 0.0513  | 86  | 139.2320 | 141.3429 |

AIC = Akaike Information Criterion, BIC = Bayesian Information Criterion.
